# Supplementary material
Source: PubMed Central journal article supplement (PMC6744332)

Supplemental Figure 1

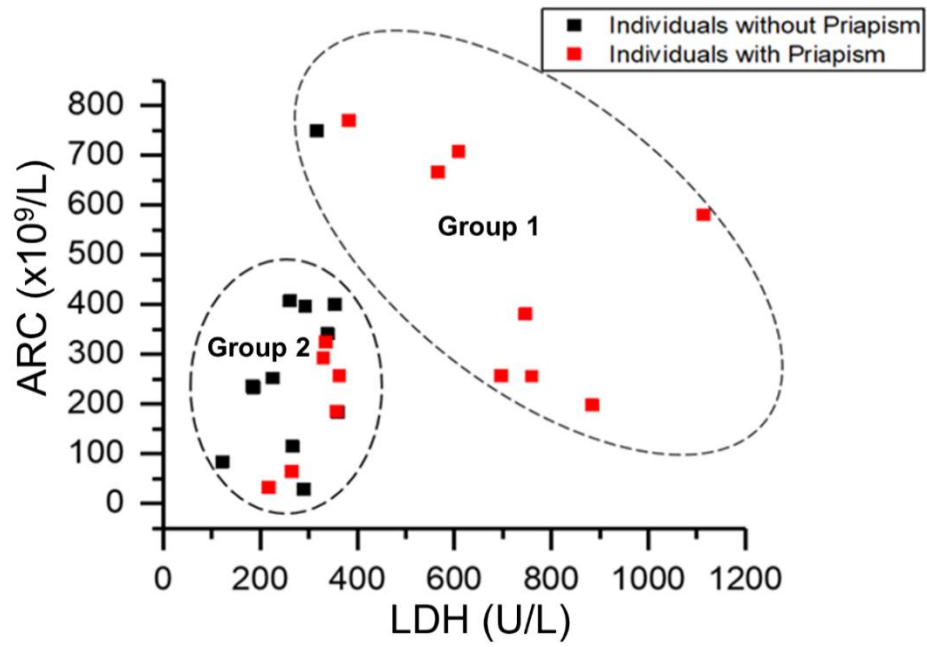

Supplement: NIHMS1537232-supplement-1.pdf [file NIHMS1537232-supplement-1.pdf]
